# Supplementary material for: Conformational preference analysis in C 2 H 6 using orbital forces and non-covalent interactions; comparison with related systems
Source: Royal Society of Chemistry journal article supplement (doi:10.1039/d2cp04913a), 2023-01-01
Supplement: d2cp04913a1.pdf [file d2cp04913a1.pdf]

## Supporting Information

### “Conformational preference analysis in C<sub>2</sub>H<sub>6</sub> using Orbital Forces and Non-Covalent Interactions; comparison with related systems”

Trinidad Novoa,<sup>1</sup> Julia Contreras-García,<sup>1</sup> Patrick Chaquin<sup>1</sup>

<sup>1</sup> Laboratoire de Chimie Théorique (LCT)  
Sorbonne Université, CNRS, F-75005 Paris  
E-mail : chaquin@lct.jussieu.fr  
Laboratoire de Chimie Théorique (LCT)  
Sorbonne Université, CNRS, F-75005 Paris

#### NCI analysis

##### a) $s(\rho)$ diagram

Conformational differences are very subtle. Nonetheless, they can be identified by comparison of the  $s(\rho)$  diagram among the various conformers. This is shown in Figure S1 for ethane (left) and C<sub>2</sub>F<sub>6</sub> (right).

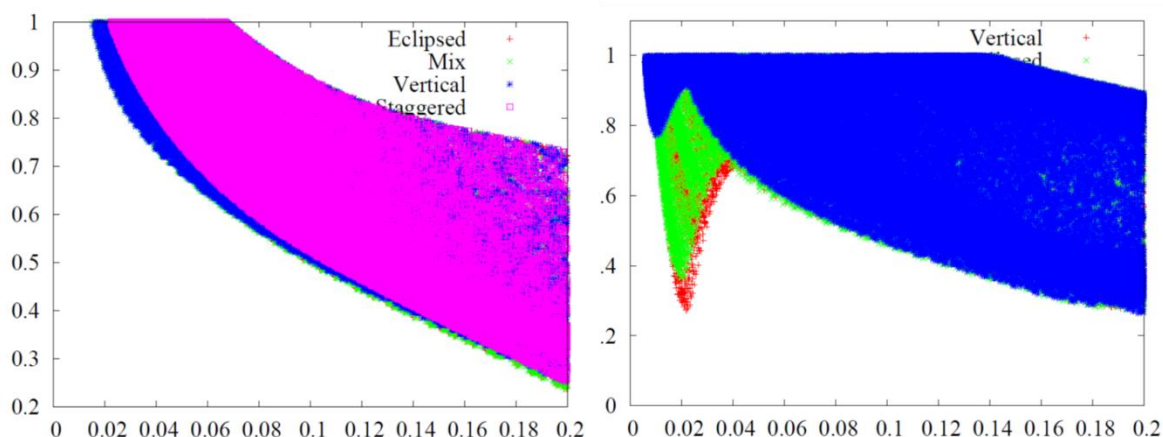

**Figure S1.** Reduced density gradient vs density plot enabling to see deformations for the different conformations. Left: ethane. Right: C<sub>2</sub>F<sub>6</sub>.

It can be seen that differences are very subtle in ethane. Setting  $\rho_{\max}=0.037$  and  $s=0.8$ , we can isolate the small differences and highlight the differential interactions as done in Scheme 1. This value is chosen so as to avoid including the baseline, which would show the atomic features.

Differences are much more visible in fluoroethane. In this case, setting  $\rho_{\max}=0.04$  and  $s=0.6$  allows to visualize F...F interactions between the CF<sub>3</sub> fragments (Scheme 2). If a higher isosurface is plotted ( $\rho_{\max}=0.04$ ,  $s=0.9$ ), the F...F interactions within each fragment also appear (Figure S2).

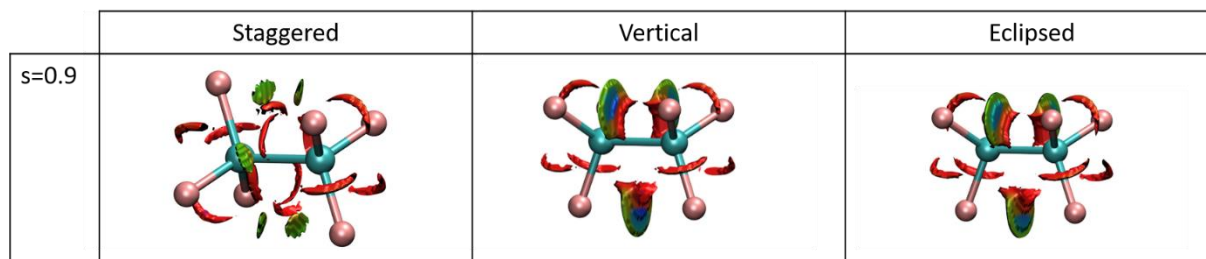

Figure S2. Evolution of NCI surfaces for the different C<sub>2</sub>F<sub>6</sub> states for  $\rho_{\max}=0.04$ ,  $s=0.9$ .

### Optimized geometry coordinates (H-F/aug-cc-pvQZ)

#### C<sub>2</sub>H<sub>6</sub> (Staggered)

|   |   |   |           |           |           |
|---|---|---|-----------|-----------|-----------|
| 1 | 6 | 0 | 0.000000  | 0.000000  | 0.000000  |
| 2 | 6 | 0 | 0.000000  | 0.000000  | 1.524135  |
| 3 | 1 | 0 | 1.010147  | 0.000000  | -0.391992 |
| 4 | 1 | 0 | -0.505073 | 0.874813  | -0.391992 |
| 5 | 1 | 0 | -0.505073 | -0.874813 | -0.391992 |
| 6 | 1 | 0 | 0.505073  | 0.874813  | 1.916127  |
| 7 | 1 | 0 | 0.505073  | -0.874813 | 1.916127  |
| 8 | 1 | 0 | -1.010147 | 0.000000  | 1.916127  |

#### C<sub>2</sub>H<sub>6</sub> (Eclipsed)

|   |   |   |           |           |           |
|---|---|---|-----------|-----------|-----------|
| 1 | 6 | 0 | 0.000000  | 0.000000  | 0.000000  |
| 2 | 6 | 0 | 0.000000  | 0.000000  | 1.538668  |
| 3 | 1 | 0 | 1.006227  | 0.000000  | -0.398681 |
| 4 | 1 | 0 | -0.503114 | -0.871418 | -0.398681 |
| 5 | 1 | 0 | -0.503114 | 0.871418  | -0.398681 |
| 6 | 1 | 0 | 1.006227  | 0.000000  | 1.937348  |
| 7 | 1 | 0 | -0.503114 | -0.871418 | 1.937348  |
| 8 | 1 | 0 | -0.503114 | 0.871418  | 1.937348  |

#### CH<sub>3</sub>SiH<sub>3</sub> (Staggered)

|   |    |   |           |           |           |
|---|----|---|-----------|-----------|-----------|
| 1 | 14 | 0 | 0.000000  | 0.000000  | 0.634590  |
| 2 | 6  | 0 | 0.000000  | 0.000000  | -1.243005 |
| 3 | 1  | 0 | 0.000000  | 1.384474  | 1.154178  |
| 4 | 1  | 0 | 1.198990  | -0.692237 | 1.154178  |
| 5 | 1  | 0 | -1.198990 | -0.692237 | 1.154178  |
| 6 | 1  | 0 | 0.876925  | 0.506293  | -1.629589 |
| 7 | 1  | 0 | -0.876925 | 0.506293  | -1.629589 |
| 8 | 1  | 0 | -0.000000 | -1.012585 | -1.629589 |

CH<sub>3</sub>SiH<sub>3</sub> (Eclipsed)

|   |    |   |           |           |           |
|---|----|---|-----------|-----------|-----------|
| 1 | 14 | 0 | 0.000000  | 0.000000  | 0.637777  |
| 2 | 6  | 0 | 0.000000  | 0.000000  | -1.251015 |
| 3 | 1  | 0 | 0.000000  | 1.381345  | 1.165517  |
| 4 | 1  | 0 | -1.196280 | -0.690673 | 1.165517  |
| 5 | 1  | 0 | 1.196280  | -0.690673 | 1.165517  |
| 6 | 1  | 0 | 0.000000  | 1.010795  | -1.639780 |
| 7 | 1  | 0 | -0.875374 | -0.505398 | -1.639780 |
| 8 | 1  | 0 | 0.875374  | -0.505398 | -1.639780 |

Si<sub>2</sub>H<sub>6</sub> (Staggered)

|   |    |   |           |           |           |
|---|----|---|-----------|-----------|-----------|
| 1 | 14 | 0 | 0.000000  | 0.000000  | 1.182930  |
| 2 | 14 | 0 | -0.000000 | -0.000000 | -1.182930 |
| 3 | 1  | 0 | 0.000000  | 1.386577  | 1.696561  |
| 4 | 1  | 0 | 1.200811  | -0.693289 | 1.696561  |
| 5 | 1  | 0 | -1.200811 | -0.693289 | 1.696561  |
| 6 | 1  | 0 | 1.200811  | 0.693289  | -1.696561 |
| 7 | 1  | 0 | -1.200811 | 0.693289  | -1.696561 |
| 8 | 1  | 0 | -0.000000 | -1.386577 | -1.696561 |

Si<sub>2</sub>H<sub>6</sub> (Eclipsed)

|   |    |   |           |           |           |
|---|----|---|-----------|-----------|-----------|
| 1 | 14 | 0 | 0.000000  | 0.000000  | 1.188585  |
| 2 | 14 | 0 | 0.000000  | 0.000000  | -1.188585 |
| 3 | 1  | 0 | 0.000000  | 1.384785  | 1.705508  |
| 4 | 1  | 0 | -1.199259 | -0.692393 | 1.705508  |
| 5 | 1  | 0 | 1.199259  | -0.692393 | 1.705508  |
| 6 | 1  | 0 | 0.000000  | 1.384785  | -1.705508 |
| 7 | 1  | 0 | -1.199259 | -0.692393 | -1.705508 |
| 8 | 1  | 0 | 1.199259  | -0.692393 | -1.705508 |

CH<sub>3</sub>CF<sub>3</sub> (Staggered)

|   |   |   |           |           |           |
|---|---|---|-----------|-----------|-----------|
| 1 | 6 | 0 | 0.000000  | 0.000000  | -0.033196 |
| 2 | 6 | 0 | 0.000000  | 0.000000  | 1.466648  |
| 3 | 9 | 0 | 0.000000  | 1.224599  | -0.521032 |
| 4 | 9 | 0 | -1.060534 | -0.612300 | -0.521032 |
| 5 | 9 | 0 | 1.060534  | -0.612300 | -0.521032 |
| 6 | 1 | 0 | -0.882753 | 0.509658  | 1.822383  |
| 7 | 1 | 0 | 0.882753  | 0.509658  | 1.822383  |
| 8 | 1 | 0 | -0.000000 | -1.019315 | 1.822383  |

CH<sub>3</sub>CF<sub>3</sub> (Eclipsed)

|   |   |   |           |           |           |
|---|---|---|-----------|-----------|-----------|
| 1 | 6 | 0 | 0.000000  | 0.000000  | -0.033002 |
| 2 | 6 | 0 | 0.000000  | 0.000000  | 1.483077  |
| 3 | 9 | 0 | 0.000000  | 1.222571  | -0.527378 |
| 4 | 9 | 0 | 1.058778  | -0.611285 | -0.527378 |
| 5 | 9 | 0 | -1.058778 | -0.611285 | -0.527378 |
| 6 | 1 | 0 | 0.000000  | 1.015507  | 1.846251  |
| 7 | 1 | 0 | 0.879455  | -0.507753 | 1.846251  |
| 8 | 1 | 0 | -0.879455 | -0.507753 | 1.846251  |

C<sub>2</sub>F<sub>6</sub> (Staggered)

|   |   |   |           |           |           |
|---|---|---|-----------|-----------|-----------|
| 1 | 6 | 0 | 0.000000  | 0.000000  | 0.769723  |
| 2 | 6 | 0 | -0.000000 | -0.000000 | -0.769723 |
| 3 | 9 | 0 | 0.000000  | 1.225693  | 1.211847  |
| 4 | 9 | 0 | 1.061481  | -0.612846 | 1.211847  |
| 5 | 9 | 0 | -1.061481 | -0.612846 | 1.211847  |
| 6 | 9 | 0 | 1.061481  | 0.612846  | -1.211847 |
| 7 | 9 | 0 | -1.061481 | 0.612846  | -1.211847 |
| 8 | 9 | 0 | -0.000000 | -1.225693 | -1.211847 |

C<sub>2</sub>F<sub>6</sub> (Eclipsed)

|   |   |   |           |           |           |
|---|---|---|-----------|-----------|-----------|
| 1 | 6 | 0 | 0.000000  | 0.000000  | 0.784814  |
| 2 | 6 | 0 | 0.000000  | 0.000000  | -0.784814 |
| 3 | 9 | 0 | 0.000000  | 1.221557  | 1.236349  |
| 4 | 9 | 0 | -1.057900 | -0.610779 | 1.236349  |
| 5 | 9 | 0 | 1.057900  | -0.610779 | 1.236349  |
| 6 | 9 | 0 | 0.000000  | 1.221557  | -1.236349 |
| 7 | 9 | 0 | -1.057900 | -0.610779 | -1.236349 |
| 8 | 9 | 0 | 1.057900  | -0.610779 | -1.236349 |
